# Supplementary material for: Hollow CoFe-based hybrid composites derived from unique S-modulated coordinated transition bimetal complexes for efficient oxygen evolution from water splitting under alkaline conditions
Source: Royal Society of Chemistry journal article supplement (doi:10.1039/d2dt02415b), 2022-01-01
Supplement: d2dt02415b1.pdf [file d2dt02415b1.pdf]

Supporting Information

**Hollow CoFe-based hybrid composites derived from unique S-modulated coordinated transition bimetal complexes for efficient oxygen evolution from water-splitting under alkaline conditions.**

Dukhyun Nam<sup>a</sup>, GeunHyeong Lee<sup>a</sup>, Jooheon Kim<sup>a,b,c</sup> \*

<sup>a</sup> School of Chemical Engineering & Materials Science, Chung-Ang University, 84 Heukseok-ro, Dongjak-gu, Seoul, Korea

<sup>b</sup> Department of Advanced Materials Engineering, Chung-Ang University, Anseong-si, Gyeonggi-do 17546, Republic of Korea

<sup>c</sup> Department of Intelligent Energy and Industry, Graduate School, Chung-Ang University, Seoul 06974, Republic of Korea

\*Corresponding author

Prof. Jooheon Kim: [jooheonkim@cau.ac.kr](mailto:jooheonkim@cau.ac.kr)

## **Detail methods**

### **Characterization methods.**

Images of the nanoparticles morphology were acquired by field emission scanning electron microscope (FE-SEM, SIGMA 300, Carl Zeiss, Korea). Then, images of the nanoparticles morphology and energy dispersive X-ray (EDX) mapping data were acquired by field emission transmission electron microscopy (FE-TEM, JEM-F200, JEOL, Korea). The amorphous phase of obtained catalysts was confirmed by X-ray diffraction (XRD, Bruker-AXS, country) using a Cu K $\alpha$  radiation source at 40 kV ( $\lambda = 0.154$  nm, scan rate = 1.2°/min, step size = 0.02° and diffraction range =  $10^\circ \leq 2\theta \leq 80^\circ$ ). X-ray photoelectron spectroscopy (XPS, K-alpha, ThermoFisher Scientific, country) analysis was used to explore the electrochemical bond structure of the catalysts and to examine the effects of interaction between atoms.

### **Electrochemical activity measurements.**

Electrochemical performance of all samples was evaluated using three-electrode configuration with a potentiometry (CH Instruments, CHI 600E, USA) and a rotating-disk electrode (RDE). Before measurements, the glassy carbon electrode (GCE, diameter: 3.0 mm) was polished using 1  $\mu\text{m}$  polishing diamond and 0.05  $\mu\text{m}$  polishing alumina on the polishing pad, and then rinsed with DI water. The catalytic ink was prepared by mixing synthesized catalysts (5.0 mg), DI water (700  $\mu\text{L}$ ), isopropanol (200  $\mu\text{L}$ ) and Nafion solution (100  $\mu\text{L}$ , 5 %, Alfa-Aesar). 8  $\mu\text{L}$  of catalytic ink were dropped onto the GCE surface and left to dry for 1 h under 50 °C. Electrochemical properties of the catalysts were investigated using platinum wire (counter electrode), a GCE (working electrode) and an Ag/AgCl electrode (reference electrode). All electrochemical measurements were conducted in 1 M alkaline solution (KOH) with N<sub>2</sub> gas purged for at least 30 minutes, maintaining N<sub>2</sub> saturation during the measurements. All electrochemical data were calibrated with respect to the reversible hydrogen

electrode (RHE), following the previously reported conversion equation ( $E_{\text{RHE}} = E_{\text{Ag/AgCl}} + 0.0592 \text{ pH} + E_{\text{Ag/AgCl}}^0$  at 1 M KOH media, where,  $E_{\text{Ag/AgCl}}^0$  (in 1 M KCl) = +0.235 V, pH = 14 for 1 M KOH), and also corrected by iR-compensation, to remove the ohmic potential loss, according to equation (1) :

$$E_c = E_m - I_m \times R_s \quad (1)$$

Where,  $E_c$ ,  $E_m$ ,  $I_m$  and  $R_s$  correspond to corrected voltage, measured voltage, measured current and electrolyte resistance, respectively. Electrochemical impedance spectroscopy (EIS) was recorded from 100 kHz to 0.1 Hz at 1.5 V (vs. RHE) with amplitude of 10 mV.

The overpotential was examined by LSV, using 1600 rpm at a 5 mV/s scan rate, and a voltage range of 0.2-1.0 V in Ag/AgCl. The Tafel slope was obtained from the LSV curve by applying equation (2):

$$\eta = a + b \times \log |J| \quad (2)$$

Where,  $b$ ,  $J$ , and  $\eta$  are the Tafel slope, current density and overpotential, respectively.

In order to evaluate the electrochemically active surface area (ECSA), cyclic voltammetry (CV) curve was obtained using a voltage range of 0.33 V to 0.43 V in RHE (no Faradaic process voltage range) with various scan rates, and the linear relationship between scan rates and current densities was estimated. As a result, we obtained the double-layer capacitance ( $C_{\text{dl}}$ ) using equation (3).

$$C_{\text{dl}} = a \times \frac{|j_a - j_c|}{2v} \quad (3)$$

### **Zn-air battery test**

The performance of a liquid rechargeable Zn-air batteries was explored by preparing it with various catalysts. An air cathode with 32-S-CoFe@NC + Pt/C as the catalyst was prepared as follows: 32-S-CoFe@NC + Pt/C (0.5 mg, (1:1)) was dispersed in an aqueous Nafion solution (1 mL, 0.5wt %) under sonication, and the obtained mixture was uniformly coated onto a piece of carbon paper (HCP030) to a catalyst loading of 1 mg/cm<sup>2</sup>. As the air cathode and anode of the Zn-air batteries, a carbon paper coated with 32-S-CoFe@NC + Pt/C and a polished Zn plate were used, respectively. A 6 M KOH solution containing 0.2 M zinc acetate was used as the electrolyte. Similarly, a mixture of Pt/C and IrO<sub>2</sub> (1:1)

was also coated onto carbon paper to prepare the corresponding air-cathodes.

The performance of assembled Zn-air batteries connected to an electrochemical workstation (CS350, CorrTest, China) was evaluated at room temperature. The discharge and charge polarization curves were obtained through LSV measurement at a scan rate of 10 mV/s. The galvanostatic discharge-charge cycling was performed at a current density of 10 mA/s with discharge and charge times of 5 min.

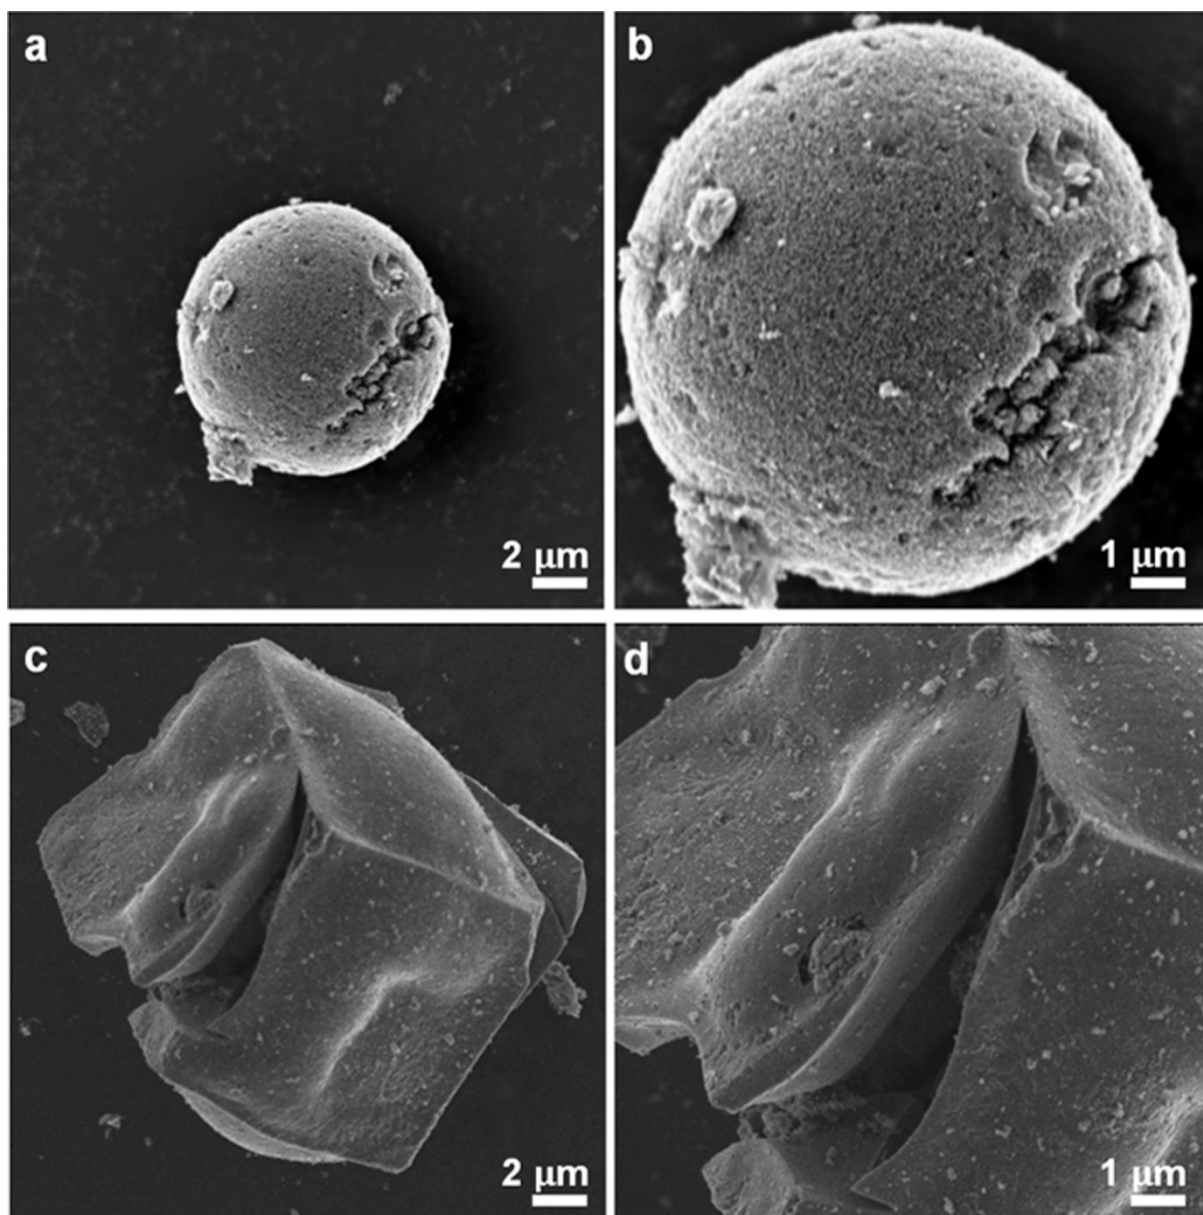

**Fig. S1.** FE-SEM images at (a) low magnification and (b) high magnification of 0-S-CoFe@NC. FE-SEM images at (c) low magnification and (d) high magnification of 23-S-CoFe@NC.

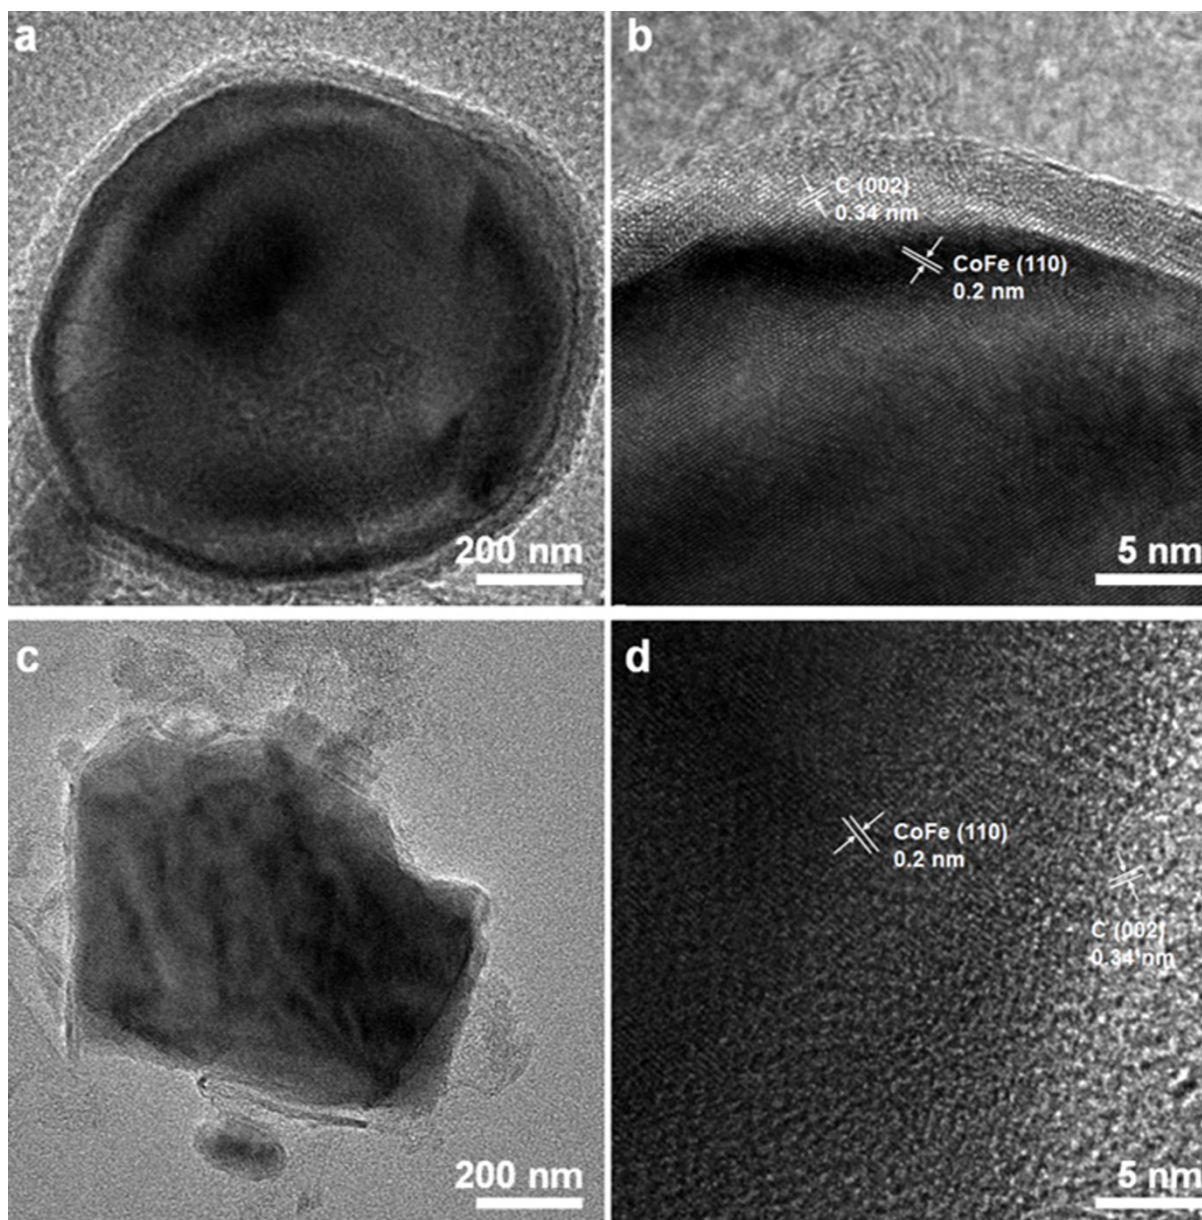

**Fig. S2.** (a) FE-TEM image and (b) HRTEM image of 0-S-CoFe@NC. (c) FE-TEM image and (d) HRTEM image of 23-S-CoFe@NC.

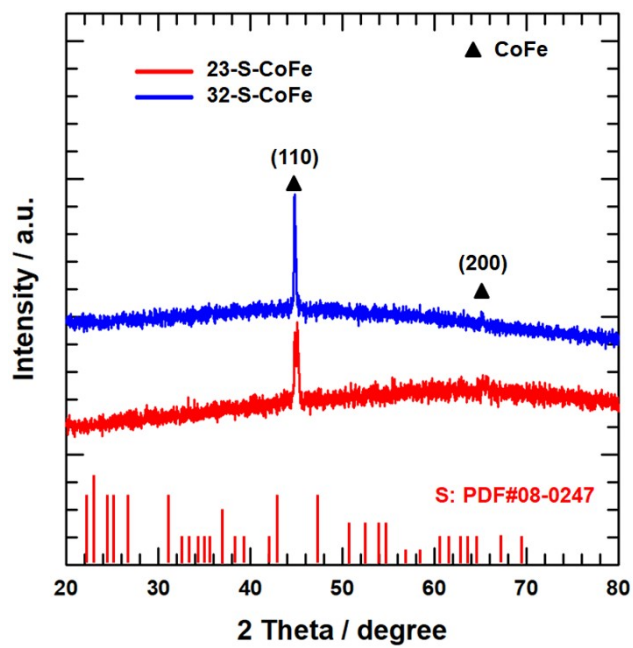

**Fig. S3.** XRD patterns of 0-S-CoFe, 23-S-CoFe, and 32-S-CoFe



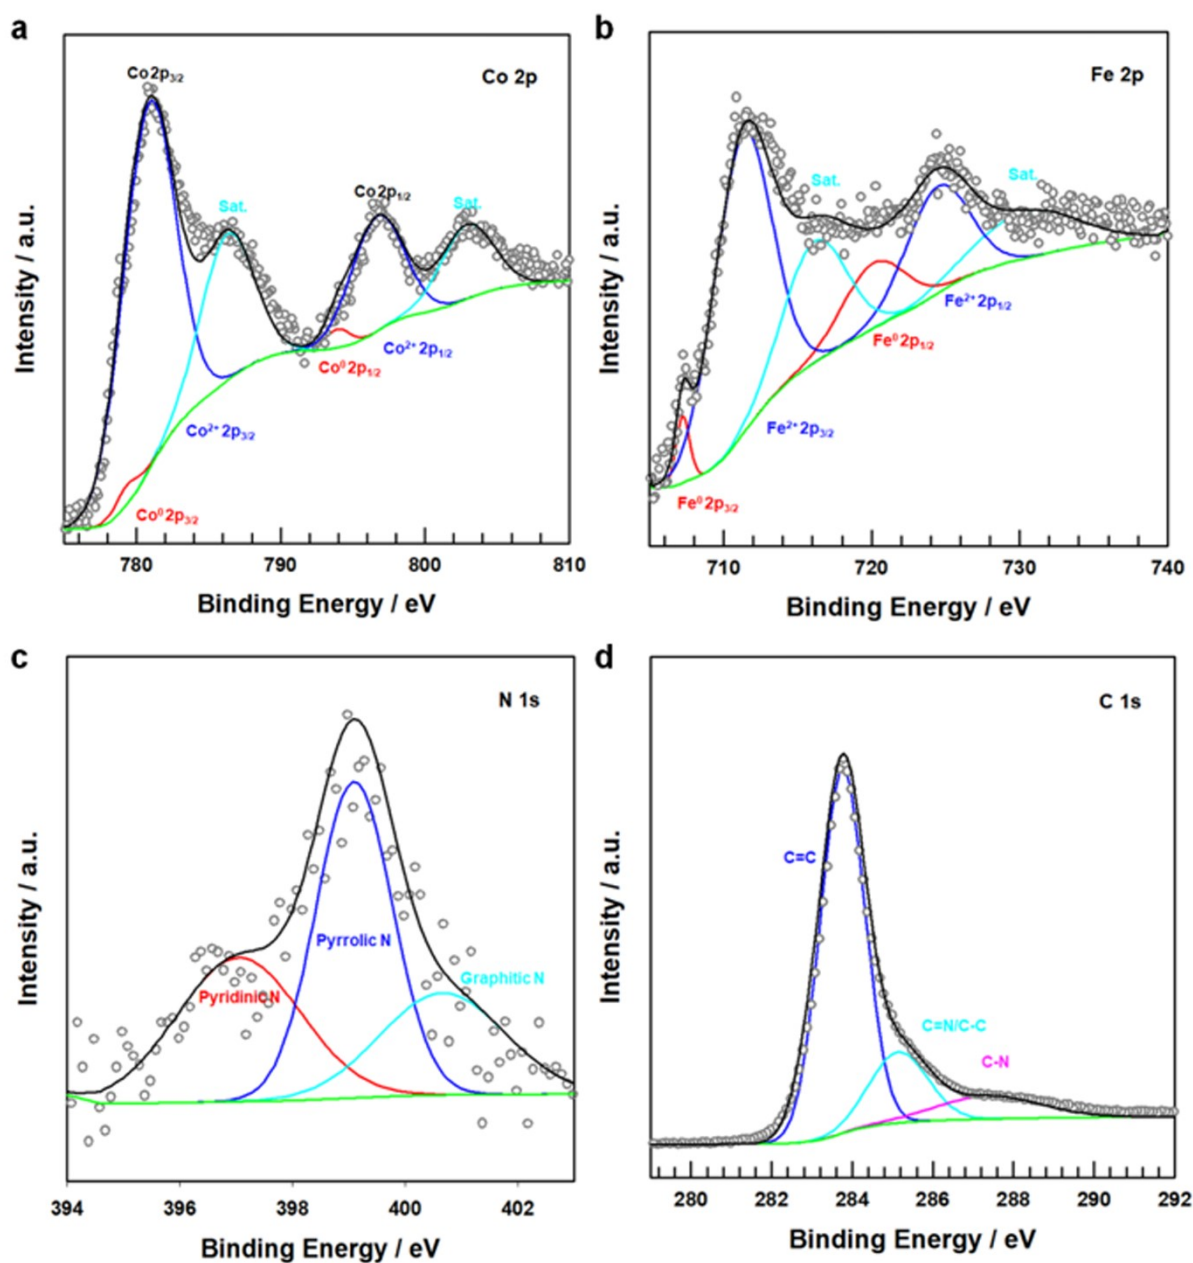

**Fig. S4.** (a) XPS Co 2p deconvolution spectra of 0-S-CoFe@NC. (b) XPS Fe 2p deconvolution spectra of 0-S-CoFe@NC. (c) XPS N 1s deconvolution spectra of 32-S-CoFe@NC. (d) XPS C 1s deconvolution spectra of 0-S-CoFe@NC.



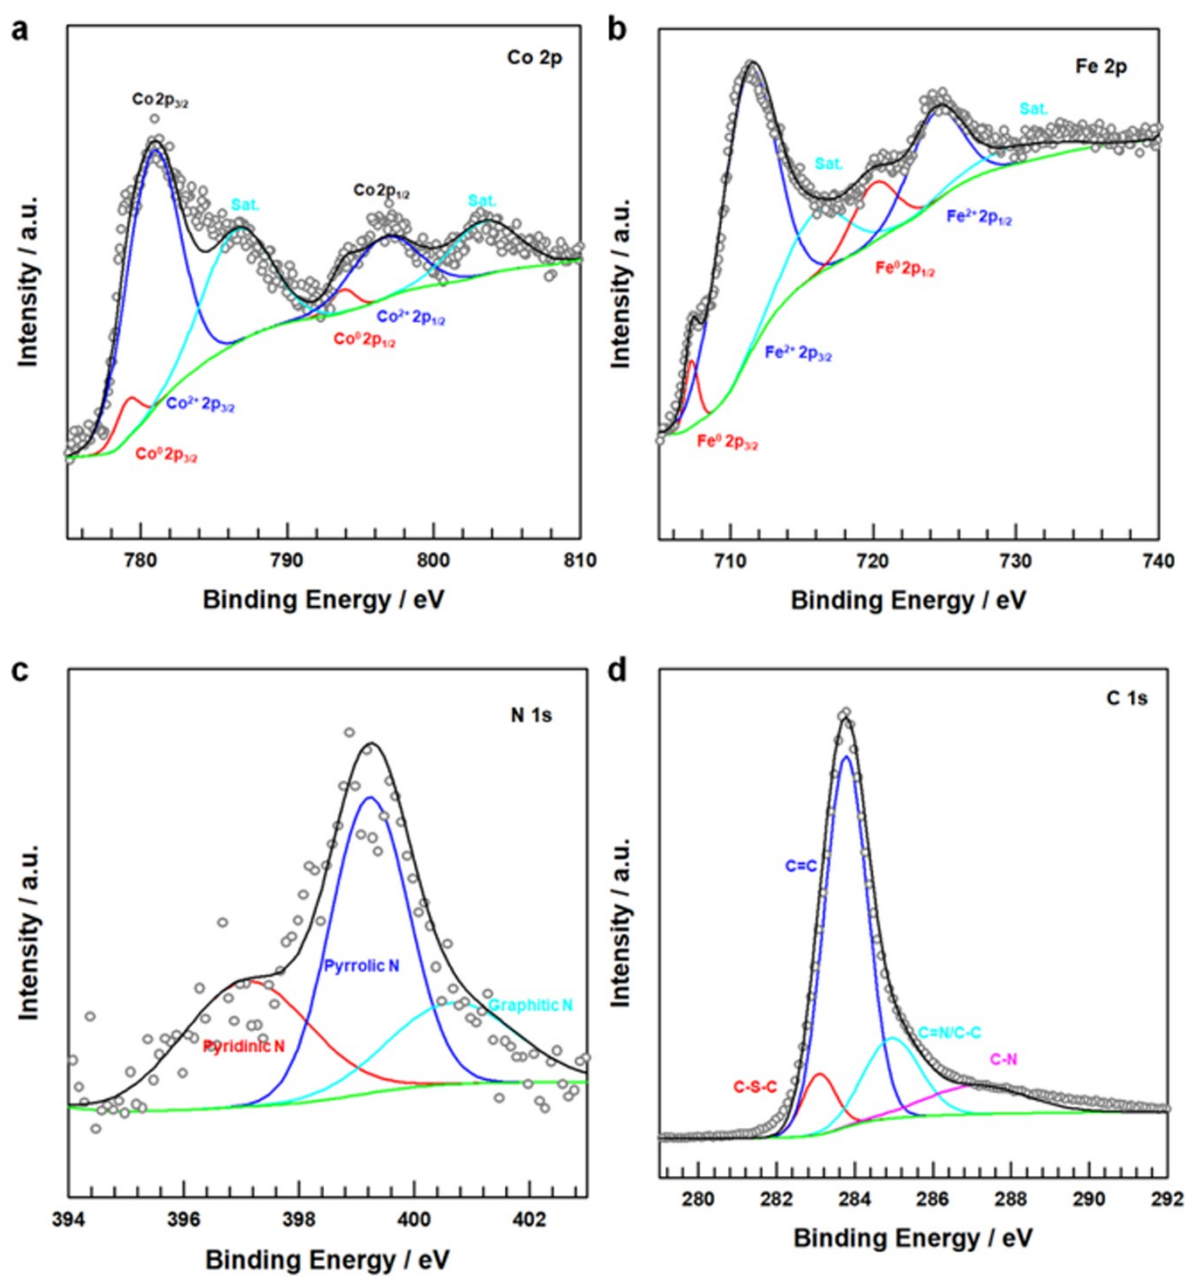

**Fig. S5.** (a) XPS Co 2p deconvolution spectra of 23-S-CoFe@NC. (b) XPS Fe 2p deconvolution spectra of 23-S-CoFe@NC. (c) XPS N 1s deconvolution spectra of 23-S-CoFe@NC. (d) XPS C 1s deconvolution spectra of 23-S-CoFe@NC.

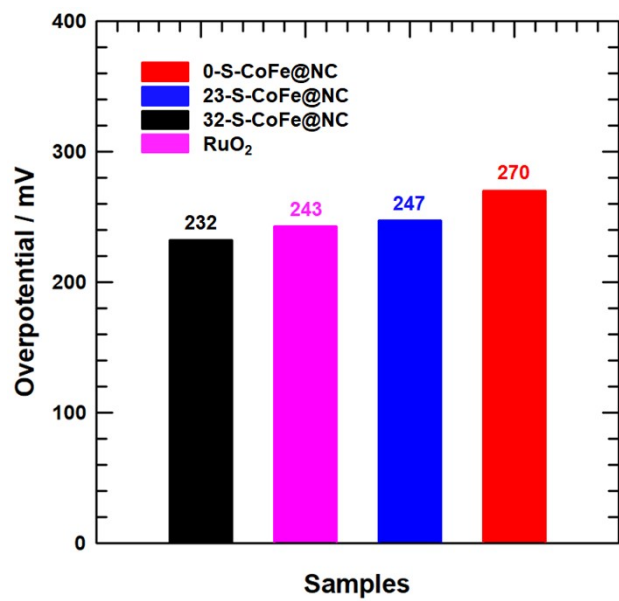

**Fig. S6.** Overpotentials at current density of 10 mA cm<sup>-2</sup>.

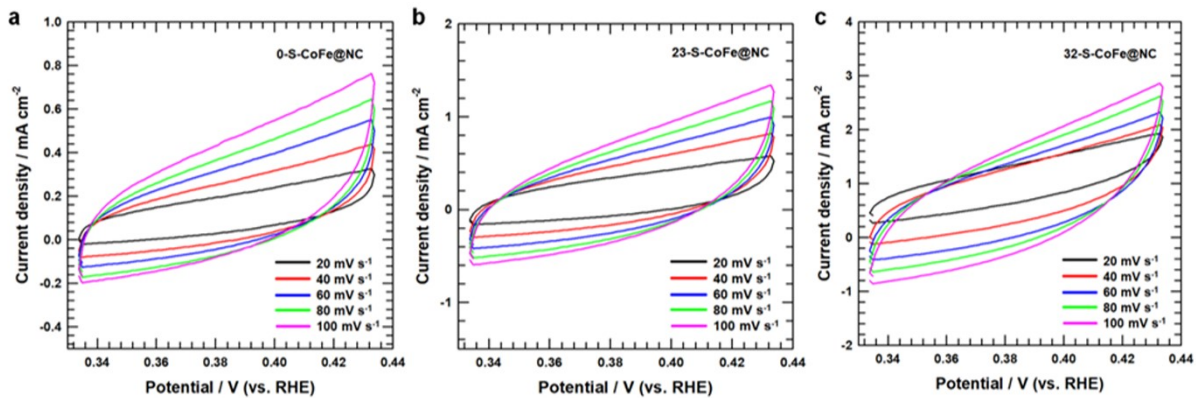

**Fig. S7.** CV curves (a) 0-S-CoFe@NC, (b) 23-S-CoFe@NC, and (c) 32-S-CoFe@NC in a non-faradic current region (0.33 – 0.43 V vs. RHE) at different scan rates of 20, 40, 60, 80, and 100  $\text{mV s}^{-1}$ .

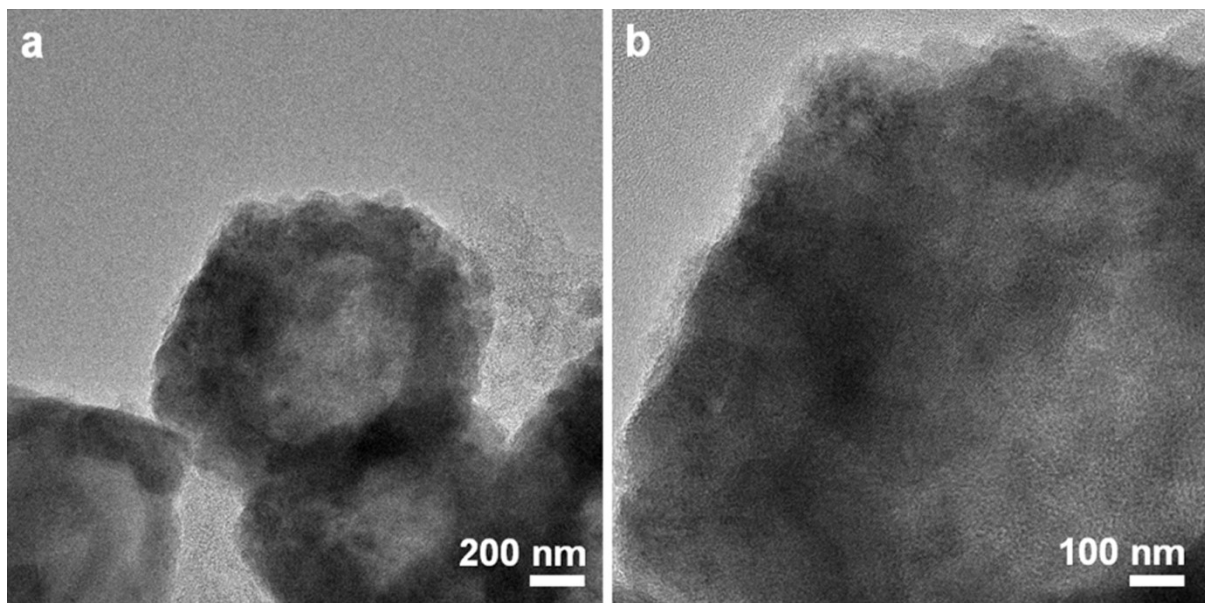

**Fig. S8.** (a) Low-magnification and (b) high-magnification FE-TEM images of after stability test.

|                                                          | OER E <sub>(at 10 mA cm<sup>-2</sup>)</sub> / V<br>(vs. RHE) | OER Tafel slope / mV<br>dec <sup>-1</sup> | Reference |
|----------------------------------------------------------|--------------------------------------------------------------|-------------------------------------------|-----------|
| Co <sub>5.47</sub> N/Co <sub>3</sub> Fe <sub>7</sub> /NC | 1.609                                                        | 62.68                                     | [S1]      |
| CoFe@NC-700                                              | 1.61                                                         | 110                                       | [S2]      |
| CoFe@NC-NCNT-H                                           | 1.61                                                         | 99.6                                      | [S3]      |
| CoFe@NC/KB-800                                           | 1.615                                                        | 91                                        | [S4]      |
| CoFe/NC <sub>30%</sub>                                   | 1.57                                                         | 77                                        | [S5]      |
| CoFe-NC/NC                                               | 1.51                                                         | 68                                        | [S6]      |
| T-FeCo/NC                                                | 1.658                                                        | 83                                        | [S7]      |
| CoFe@P-MNGF                                              | 1.56                                                         | 130.6                                     | [S8]      |
| 32-S-CoFe@NC                                             | 1.462                                                        | 83.05                                     | This work |

**Table S1.** The OER performance of 32-S-CoFe@NC in this work and some recently reported alkaline electrolyte.

|              |         |
|--------------|---------|
|              | C-S-C   |
| 0-S-CoFe@NC  | 0 %     |
| 23-S-CoFe@NC | 28.12 % |
| 32-S-CoFe@NC | 32.59 % |

**Table S2.** the C-S-C amounts of 0-S-CoFe@NC, 23-S-CoFe@NC, and 32-S-CoFe@NC.

## Reference

S1 L. Li, J. Chen, S. Wang, Y. Huang, D. Cao, MOF-derived CoN/CoFe/NC bifunctional electrocatalysts for zinc-air batteries, *Appl. Surf. Sci.*, 2022, 582, 152375.

S2 Y. Wang, T. Hu, Y. Qiao, Y. Chen, Synergistic engineering of defects and architecture in CoFe@NC toward highly efficient oxygen electrode reactions, *Int. J. Hydrog. Energy*, 2020, 45, 8686-8694.

S3 Z. Shang, Z. Chen, Z. Zhang, J. Yu, S. Tan, F. Ciucci, Z. Shao, H. Lei, D. Chen, CoFe nanoalloy particles encapsulated in nitrogen-doped carbon layers as bifunctional oxygen catalyst derived from a Prussian blue analogue, *J. Alloys Compd.*, 2018, 740, 743-753.

S4 S. Ren, X. Duan, F. Ge, Z. Chen, Q. Yang, M. Zhang, H. Zheng, Novel MOF-derived hollow CoFe alloy coupled with N-doped Ketjen Black as boosted bifunctional oxygen catalysts for Zn-air batteries, *Chem. Eng. J.*, 2022, 427, 131614.

S5 G.A. Gebreslase, M.V. Martinez-Huerta, D. Sebastian, M.J. Lazaro, Transformation of CoFe<sub>2</sub>O<sub>4</sub> spinel structure into active and robust CoFe alloy/N-doped carbon electrocatalyst for oxygen evolution reaction, *J. Colloid Interface Sci.*, 2022, 625, 70-82.

S6 T. Najam, M. Wang, M.S. Javed, S. Ibraheem, Z. Song, M.M. Ahmed, A.U. Rehman, X. Cai, S.S.A. Shah, Nano-engineering of prussian blue analogues to core-shell architectures: Enhanced catalytic

activity for zinc-air battery, *J. Colloid Interface Sci.*, 2020, 578, 89-95.

S7 L. Huang, L. Zuo, Z. He, B. Xiao, H. Zhou, S. Su, Y. Li, T. Bian, A. Yuan, g-C<sub>3</sub>N<sub>4</sub> templated synthesis of the tubular CoFe/N doped carbon composite as advanced bifunctional oxygen electrocatalysts for zinc-air batteries, *J. Alloys Compd.*, 2021, 884, 161011.

S8 D.I. Jeong, H.W. Choi, S. Woo, J.H. Yoo, M. Kumar, Y.H. Song, B. Lim, B.K. Koo, B.K. Kang, D.H. Yoon, Complementary performance improved crystalline N-doped carbon encapsulated CoFe/mesoporous N-doped graphene foam as bifunctional catalyst, *Appl. Surf. Sci.*, 2021, 559, 149077.
